# Supplementary material for: A two-storey structured photoanode of a 3D Cu2ZnSnS4/CdS/ZnO@steel composite nanostructure for efficient photoelectrochemical hydrogen generation
Source: Royal Society of Chemistry journal article supplement (doi:10.1039/c5nr04107d), 2015-01-01
Supplement: c5nr04107d1.pdf [file c5nr04107d1.pdf]

**Supporting Information**

**Two-storey structure photoanode of 3D  
 $\text{Cu}_2\text{ZnSnS}_4/\text{CdS}/\text{ZnO}$ @steel composite nanostructure for  
efficient photoelectrochemical hydrogen generation**

Youngwoo Choi,<sup>†</sup> Minki Baek,<sup>†</sup> Zhuo Zhang,<sup>†</sup> Van-Duong Dao,<sup>‡</sup> Ho-Suk Choi,<sup>‡</sup> Kijung Yong<sup>†, \*</sup>

<sup>†</sup>Surface Chemistry Laboratory of Electronic Materials, Department of Chemical Engineering, Pohang University of Science and Technology (POSTECH), Pohang 790-784, Korea. <sup>‡</sup>Department of Chemical Engineering, Chungnam National University, 220 Gung-Dong, Yuseong-Gu, Daejeon 305-764, South Korea

\* Address correspondence to [kyong@postech.ac.kr](mailto:kyong@postech.ac.kr); Fax: +82-54-279-8298; Tel: +82-54-279-2278

The TEM image of the ZnO/CdS core/shell NR in figure S1(a) shows the rough surface of CdS obtained by successive ionic layer adsorption and reaction (SILAR) process. Besides, the figure S1(b) specifically shows the rough CdS shell (It can be obtained through the etching of ZnO core in acid solution). When the CdS layer is deposited on ZnO NR by SILAR, it formed nanocrystalline (7~10 nm) structure. In particular, the reason why the tip of ZnO NR is rougher is because of the polarity of ZnO (001) plane. More  $\text{Cd}^+$  and  $\text{S}^-$  ions are adsorbed on the polar, reactive surface.

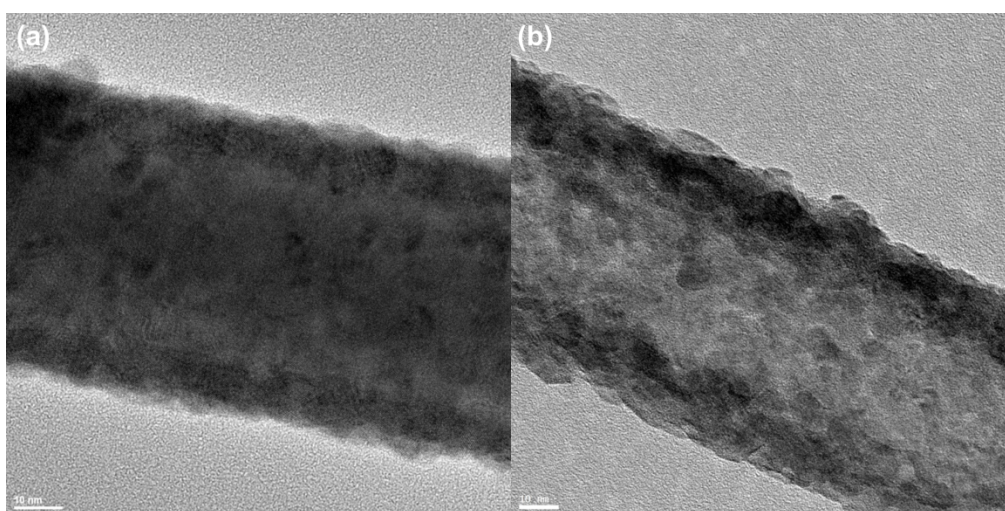

**Figure S1.** The TEM image of (a) ZnO/CdS NR and (b) CdS nanotube.
